# Supplementary material
Source: publisher figshare collection journal article supplement (https://acs.figshare.com/ndownloader/files/4949056)
Supplement: Supplementary file 1 [file 4949056]

## Supporting Information

### How a Single Electron Affects the Properties of the “Non-Superatom” Au<sub>25</sub> Nanoclusters

Yongbo Song, Shan Jin, Xi Kang, Ji Xiang, Huijuan Deng, Haizhu Yu,\* and Manzhou Zhu\*

*Department of Chemistry and Centre for Atomic Engineering of Advanced Materials, Anhui University,  
Hefei, Anhui, 230601, People's Republic of China*

Emails: [yuhaizhu@ahu.edu.cn](mailto:yuhaizhu@ahu.edu.cn);  
[zmz@ahu.edu.cn](mailto:zmz@ahu.edu.cn);

#### 1. The crystal structures of the Au<sub>25</sub>-II and Au<sub>25</sub>-I nanoclusters.

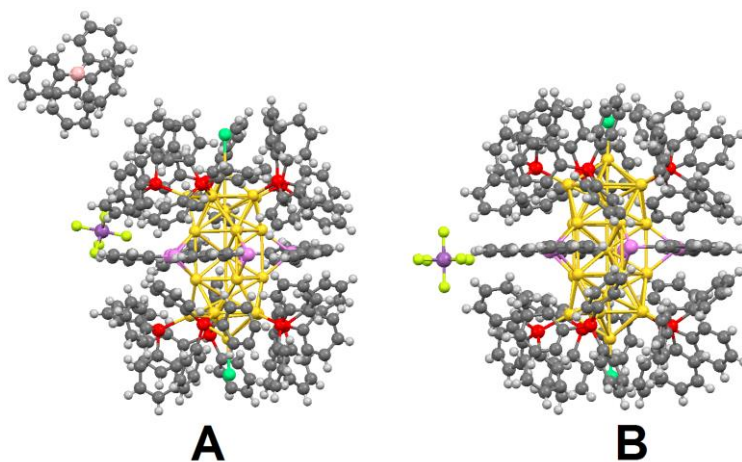

**Figure S1.** The total crystal structures of the Au<sub>25</sub>-II and Au<sub>25</sub>-I nanoclusters (color labels: Au = yellow; P = red; Cl = green; Se = violet; C = gray; H = white; F = kelly; Sb = purple; B = pink.)

## 2. The Time-dependent UV-vis absorption spectra.

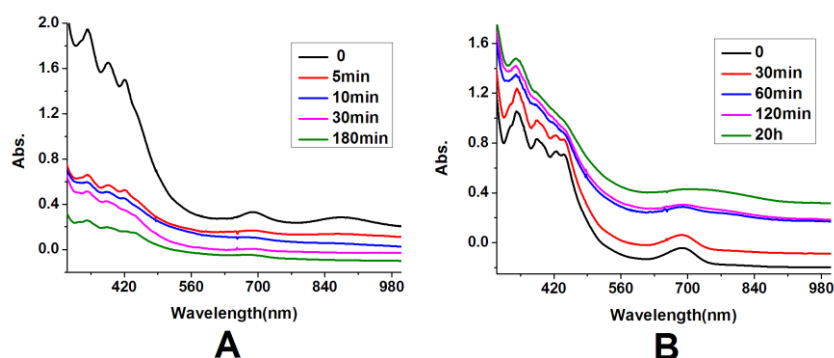

**Figure S2.** Time-dependent UV-vis absorption spectra of **Au<sub>25</sub>-I** nanoclusters reacting with  $\text{H}_2\text{O}_2$  (A) and **Au<sub>25</sub>-II** nanoclusters reacting with  $\text{NaBH}_4$  (B).

## 3. The assemble packing of **Au<sub>25</sub>-II** and **Au<sub>25</sub>-I** nanoclusters.

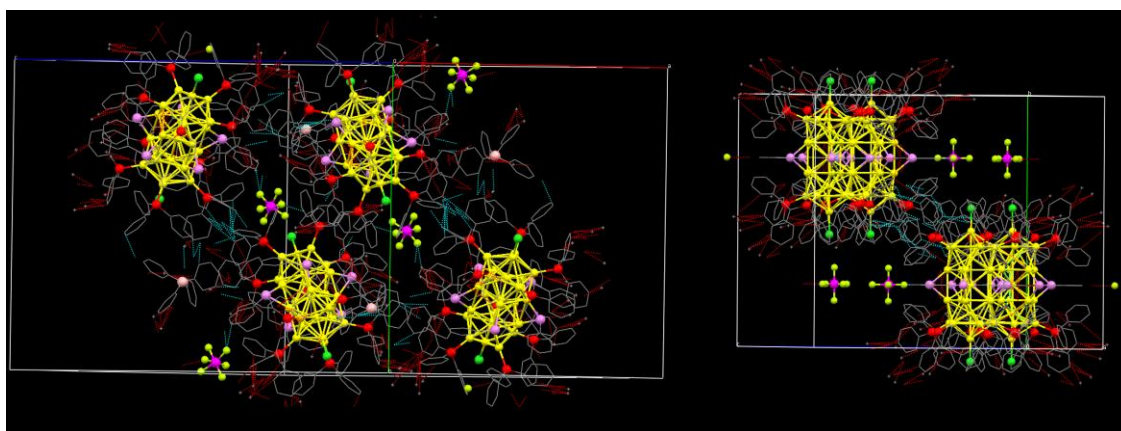

**Figure S3.** The assemble packing of **Au<sub>25</sub>-II** (left) and **Au<sub>25</sub>-I** (right) nanoclusters: The weak interactions between  $\text{Ph}_4\text{B}^-$  ions and rod-like **Au<sub>25</sub>-II** nanoclusters (left) has been marked by the dot line. By contrast, the weak forces between  $\text{SbF}_6^-$  ions and rod-like **Au<sub>25</sub>-I** nanoclusters are hardly achieved (right).

#### 4. The optical gaps.

According to the mass-energy equation, we found the optical gap of the **Au<sub>25</sub>-II** and **Au<sub>25</sub>-I** nanoclusters is 1.62 eV and 1.21 eV, respectively.

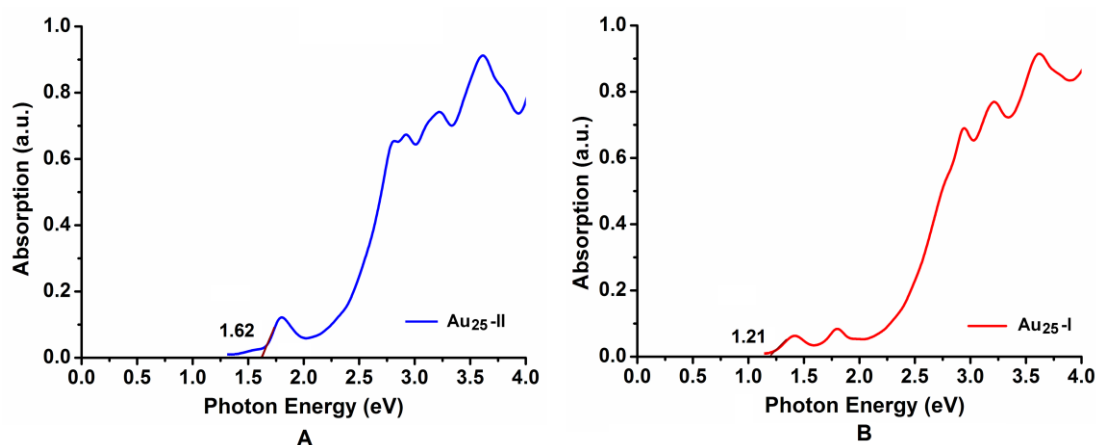

**Figure S4.** The optical gaps of the **Au<sub>25</sub>-II** (A) and **Au<sub>25</sub>-I** (B) nanoclusters.

#### 5. TD-DFT analysis.

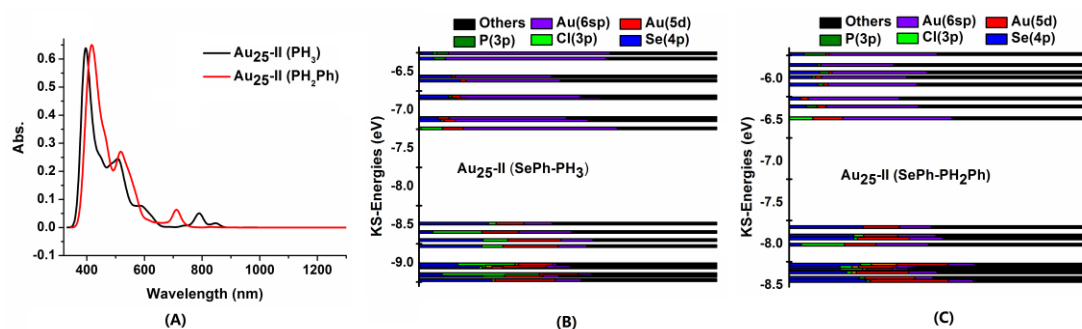

**Figure S5.** (A) Comparison of theoretical optical curves of **Au<sub>25</sub>-II** (PH<sub>3</sub>) and **Au<sub>25</sub>-II** (PH<sub>2</sub>Ph) nanoclusters. Comparison of the component of KS orbitals of **Au<sub>25</sub>-II** (PH<sub>3</sub>) (B) and **Au<sub>25</sub>-II** (PH<sub>2</sub>Ph) (C) nanoclusters.

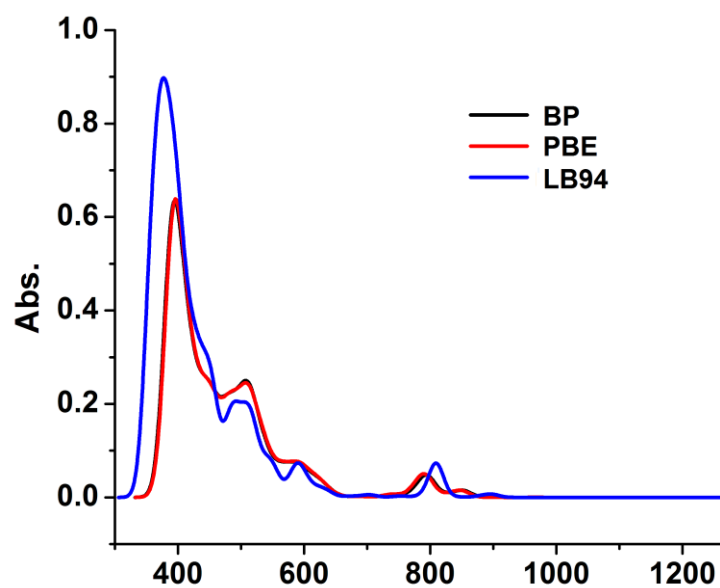

**Figure S6.** The theoretical optical curves with the different theoretical methods such as BP (black line), PBE (red line), LB94 (blue line).

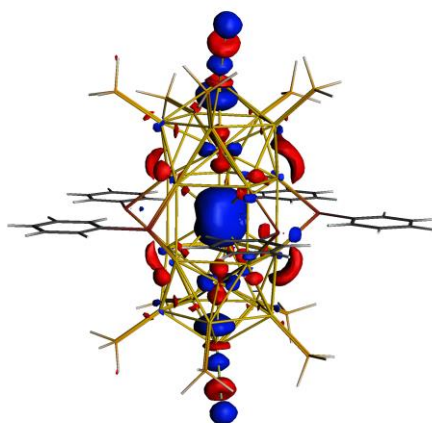

**Figure S7.** The distribution of electron density of SMO in the **Au<sub>25</sub>-I** nanocluster.

## 6. X-ray Crystallographic Determination

**Table S1. Crystal Data and Structure Refinement for the [Au<sub>25</sub>(PPh<sub>3</sub>)<sub>10</sub>(SePh)<sub>5</sub>Cl<sub>2</sub>](SbF<sub>6</sub>) Nanocluster.**

| Identification code               | [Au <sub>25</sub> (PPh <sub>3</sub> ) <sub>10</sub> (SePh) <sub>5</sub> Cl <sub>2</sub> ](SbF <sub>6</sub> )        |
|-----------------------------------|---------------------------------------------------------------------------------------------------------------------|
| Empirical formula                 | C <sub>210</sub> H <sub>175</sub> Au <sub>25</sub> Cl <sub>2</sub> F <sub>6</sub> P <sub>10</sub> SbSe <sub>5</sub> |
| Formula weight                    | 8633.81 g/mol                                                                                                       |
| Temperature                       | 291(2) K                                                                                                            |
| Wavelength                        | 0.71073 Å                                                                                                           |
| Crystal system, space group       | Orthorhombic P n m a                                                                                                |
| Unit cell dimensions              | a = 30.927(4) Å    α = 90°<br>b = 26.416(3) Å    β = 90°<br>c = 31.341(4) Å    γ = 90°                              |
| Volume                            | 25604(5) Å <sup>3</sup>                                                                                             |
| Z, Calculated density             | 4, 2.240 Mg/mm <sup>3</sup>                                                                                         |
| Absorption coefficient            | 15.200 mm <sup>-1</sup>                                                                                             |
| F(000)                            | 15476                                                                                                               |
| Crystal size                      | 0.24 x 0.22 x 0.20 mm <sup>3</sup>                                                                                  |
| Theta range for data collection   | 0.92 to 27.45°                                                                                                      |
| index ranges                      | 0 ≤ h ≤ 39, 0 ≤ k ≤ 33, 0 ≤ l ≤ 40                                                                                  |
| Reflections collected             | 221040                                                                                                              |
| Completeness to theta = 27.45     | 98.5%                                                                                                               |
| Absorption correction             | 15.20                                                                                                               |
| Refinement method                 | SHELXTL                                                                                                             |
| Max. and min. transmission        | 0.15 and 0.12                                                                                                       |
| Data / restraints / parameters    | 29451 / 0 / 1228                                                                                                    |
| Goodness-of-fit on F <sup>2</sup> | 1.065                                                                                                               |
| Final R indices [I > 2σ(I)]       | R1 = 0.0503, wR2 = 0.1211                                                                                           |
| R indices (all data)              | R1 = 0.0501, wR2 = 0.1215                                                                                           |
| Largest diff. peak and hole       | 1.713 and -2.305 e.Å <sup>-3</sup>                                                                                  |

**Table S2. Crystal Data and Structure Refinement for the [Au<sub>25</sub>(PPh<sub>3</sub>)<sub>10</sub>(SePh)<sub>5</sub>Cl<sub>2</sub>](SbF<sub>6</sub>)(BPh<sub>4</sub>) Nanocluster.**

|                                   |                                                                                                                                 |                 |
|-----------------------------------|---------------------------------------------------------------------------------------------------------------------------------|-----------------|
| Identification code               | [Au <sub>25</sub> (PPh <sub>3</sub> ) <sub>10</sub> (SePh) <sub>5</sub> Cl <sub>2</sub> ](SbF <sub>6</sub> )(BPh <sub>4</sub> ) |                 |
| Empirical formula                 | C <sub>234</sub> H <sub>195</sub> Au <sub>25</sub> Cl <sub>2</sub> F <sub>6</sub> P <sub>10</sub> SbSe <sub>5</sub> B           |                 |
| Formula weight                    | 8953.02 g/mol                                                                                                                   |                 |
| Temperature                       | 291(2) K                                                                                                                        |                 |
| Wavelength                        | 0.71073 Å                                                                                                                       |                 |
| Crystal system, space group       | Monoclinic P2(1)/c                                                                                                              |                 |
| Unit cell dimensions              | a = 27.378(2) Å                                                                                                                 | α = 90.00°      |
|                                   | b = 29.361(2) Å                                                                                                                 | β = 133.273(2)° |
|                                   | c = 40.7368(16) Å                                                                                                               | γ = 90.00°      |
| Volume                            | 23843(3) Å <sup>3</sup>                                                                                                         |                 |
| Z, Calculated density             | 4, 2.494 Mg/mm <sup>3</sup>                                                                                                     |                 |
| Absorption coefficient            | 16.328 mm <sup>-1</sup>                                                                                                         |                 |
| F(000)                            | 16152                                                                                                                           |                 |
| Crystal size                      | 0.31 x 0.26 x 0.17 mm <sup>3</sup>                                                                                              |                 |
| Theta range for data collection   | 0.98 to 27.45°                                                                                                                  |                 |
| index ranges                      | -35 ≤ h ≤ 25, 0 ≤ k ≤ 38, 0 ≤ l ≤ 52                                                                                            |                 |
| Reflections collected             | 233703                                                                                                                          |                 |
| Completeness to theta = 27.45     | 100%                                                                                                                            |                 |
| Absorption correction             | 16.328                                                                                                                          |                 |
| Refinement method                 | SHELXTL                                                                                                                         |                 |
| Max. and min. transmission        | 0.03 and 0.02                                                                                                                   |                 |
| Data / restraints / parameters    | 54493 / 0 / 2557                                                                                                                |                 |
| Goodness-of-fit on F <sup>2</sup> | 1.009                                                                                                                           |                 |
| Final R indices [I > 2σ(I)]       | R1 = 0.0549, wR2 = 0.1375                                                                                                       |                 |
| R indices (all data)              | R1 = 0.0564, wR2 = 0.1379                                                                                                       |                 |
| Largest diff. peak and hole       | 1.779 and -1.585 e.Å <sup>-3</sup>                                                                                              |                 |
